# Supplementary material for: Multimodality analysis confers a prognostic benefit of a T-cell infiltrated tumor microenvironment and peripheral immune status in patients with melanoma
Source: PubMed Central journal article supplement — J Immunother Cancer. 2022 Sep 29;10(9):e005052. doi: 10.1136/jitc-2022-005052 (PMC9528663; doi:10.1136/jitc-2022-005052), 2022-09-29
Supplement: jitc-2022-005052supp001.pdf [file jitc-2022-005052supp001.pdf]

## **Multimodality analysis confers a prognostic benefit of a T-cell infiltrated tumor microenvironment and peripheral immune status in patients with melanoma**

Georgia M. Beasley (1, 2)\*, Michael C. Brown (3)\*, Norma Farrow (1), Karenia Landa (1), Rami N Al-Rohil (4), Maria Angelica Selim (4), Aaron Therien (1), Sin-Ho Jung, (5), Junheng Gao (5), David Boczkowski (1), Eda Holl, (1), April Salama (2), Darell D. Bigner (2, 3, 4), Matthias Gromeier (2, 3, 6), Smita K. Nair (1, 3, 4).

### **\*co-first authors**

1. Duke University, Department of Surgery
2. Duke University, Department of Medicine
3. Duke University, Department of Neurosurgery
4. Duke University, Department of Pathology
5. Duke University, Department of Biostatistics and Bioinformatics
6. Duke University, Department of Molecular Genetics and Microbiology

### **Corresponding Author (s):**

Georgia M. Beasley MD, MHS

Duke University School of Medicine, Box 3118, Durham, NC 27710

Email: georgia.beasley@duke.edu Tel: 919-684-6858

Smita K. Nair, PhD

Duke University School of Medicine, Box 103035, Durham, NC 27710

Email: smita.nair@duke.edu Tel: 919-681-2180

Running Head: Immune status is linked with viral immunotherapy response

Supplementary Table 1

| Scan_ID   | CD127 | CD25  | CD27   | CD4    | CD44    | CD45RO  | CD8    | GZMB   | HLA-DR | ICOS  | Ki-67   | Tim-3  |
|-----------|-------|-------|--------|--------|---------|---------|--------|--------|--------|-------|---------|--------|
| 1 Pre     | 3.96  | 1.68  | 6.77   | 40.77  | 181.735 | 12.79   | 75.685 | 10.295 | 73.59  | 6.735 | 22.86   | 4.84   |
| 1 Pre-Non | 3.43  | 1.87  | 1.9    | 31.4   | 130.81  | 4.99    | 18.87  | 7.02   | 65.58  | 3.76  | 8.18    | 3.15   |
| 2 Pre     | 3.795 | 1.865 | 2.53   | 25.5   | 81.315  | 4.87    | 40.71  | 4.43   | 90.255 | 2.16  | 1.82    | 3.6    |
| 3 Pre     | 2.915 | 2.14  | 9.7    | 46.58  | 76.705  | 10.245  | 42.885 | 5.125  | 38.345 | 11.6  | 153.83  | 3.935  |
| 4 Pre     | 1.845 | 2.42  | 3.595  | 9.69   | 79.705  | 3.85    | 44.05  | 5.925  | 16.89  | 1.465 | 16.175  | 1.47   |
| 5 Pre     | 3.935 | 0.94  | 3.835  | 34.745 | 89.735  | 6.265   | 14.55  | 5.015  | 46.52  | 1.485 | 8.545   | 2.78   |
| 6 Pre     | 4.225 | 1.47  | 3.37   | 29.59  | 123.24  | 8.74    | 17.485 | 7.505  | 27.265 | 2.12  | 7.695   | 1.64   |
| 7 Pre     | 6.66  | 2     | 12.02  | 24.815 | 188.715 | 317.225 | 82.49  | 14.085 | 31.26  | 5.55  | 66.7    | 6.465  |
| 8 Pre     | 10.1  | 4.6   | 2.5    | 89.6   | 248.8   | 60.3    | 378.3  | 23.7   | 163.5  | 10.3  | 110.9   | 22.2   |
| 9 Pre     | 2.62  | 1.54  | 5.955  | 34.615 | 113.265 | 14.225  | 96.315 | 9.675  | 112.1  | 3.5   | 97.57   | 7.705  |
| 9 Pre-Non | 4.09  | 1.795 | 8.725  | 32.895 | 175.58  | 30.26   | 45.06  | 8.165  | 92.88  | 2.68  | 46.62   | 11.215 |
| 12 Pre    | 2.94  | 2.585 | 10.255 | 70.675 | 228.77  | 13.65   | 123.18 | 11.825 | 63.825 | 8.545 | 119.885 | 5.065  |

Supplementary Table 1. Signal to noise ratios for represented proteins in regions of interest chosen by CD3+

Supplementary Table 2

| Scan_ID        | B7-H3     | Bcl-2  | CD4    | CD44    | CD45     | CD8    | Fibronectin | HLA-DR  | Ki-67  | MART1   | NY-ESO-1 | S100B   | STING    |
|----------------|-----------|--------|--------|---------|----------|--------|-------------|---------|--------|---------|----------|---------|----------|
| Patient 1 pre  | 9.915     | 8.495  | 9.045  | 126.1   | 37.39    | 14.7   | 24.335      | 35.65   | 18.46  | 199.35  | 4.93     | 507.115 | 17.1     |
| Patient 1 pre  | 24.55     | 6.2    | 5.68   | 202.45  | 30.68    | 11.4   | 81.075      | 17.765  | 13.48  | 183.85  | 3.95     | 643.355 | 29.155   |
| Patient 2 Pre  | 19.35     | 9.7975 | 8.095  | 171.475 | 36.6825  | 14.6   | 41.79       | 28.985  | 15.97  | 194.6   | 4.44     | 609.455 | 16.7175  |
| Patient 3 Pre  | 41.965    | 4.44   | 4.21   | 10.6    | 9.22     | 2.885  | 50.735      | 6.745   | 33.625 | 0.775   | 4.47     | 21.795  | 4.26     |
| Patient 4 Pre  | 21.95     | 9.7975 | 7.62   | 171.475 | 36.51125 | 14.55  | 48.305      | 25.6525 | 15.97  | 192.225 | 4.44     | 609.455 | 16.52625 |
| Patient 5 Pre  | 17.55     | 5.37   | 9.915  | 249.95  | 50.59    | 3.545  | 47.415      | 22.895  | 44.685 | 41.16   | 1.585    | 78.665  | 11.47    |
| Patient 6 Pre  | 20.95     | 13.7   | 3.825  | 485.6   | 10.81    | 3.025  | 32.79       | 6.785   | 31.015 | 30.785  | 3.875    | 304.28  | 22.19    |
| Patient 7 Pre  | 18.2      | 21.1   | 8.115  | 398.9   | 79.475   | 12.2   | 18.78       | 21.02   | 28.235 | 6.84    | 3.535    | 45.275  | 16.045   |
| Patient 8 Pre  | 9.7097456 | 16.45  | 75.25  | 275.75  | 594.2    | 362.05 | 115.05      | 406.55  | 138.8  | 2.4     | 2.65     | 49.4    | 30.45    |
| Patient 9 Pre  | 10.75     | 12.6   | 26.1   | 297.25  | 166.315  | 71.45  | 65.555      | 372.8   | 122.69 | 32.345  | 9.515    | 218.395 | 28.49    |
| Patient 9 Pre  | 10.5      | 5.83   | 21.8   | 627.2   | 180.5    | 26.4   | 242.76      | 316     | 31.15  | 28.99   | 7.22     | 152.17  | 23.85    |
| Patient 12 Pre | 8.24      | 8.035  | 24.105 | 124.35  | 161.515  | 43.73  | 181.745     | 23.605  | 37.55  | 6.465   | 18.505   | 37.785  | 32.35    |

Supplementary Table 2: Signal to noise ratios for represented proteins in regions of interest chosen by location of tumor

## Supplementary Figure 1 (S1)

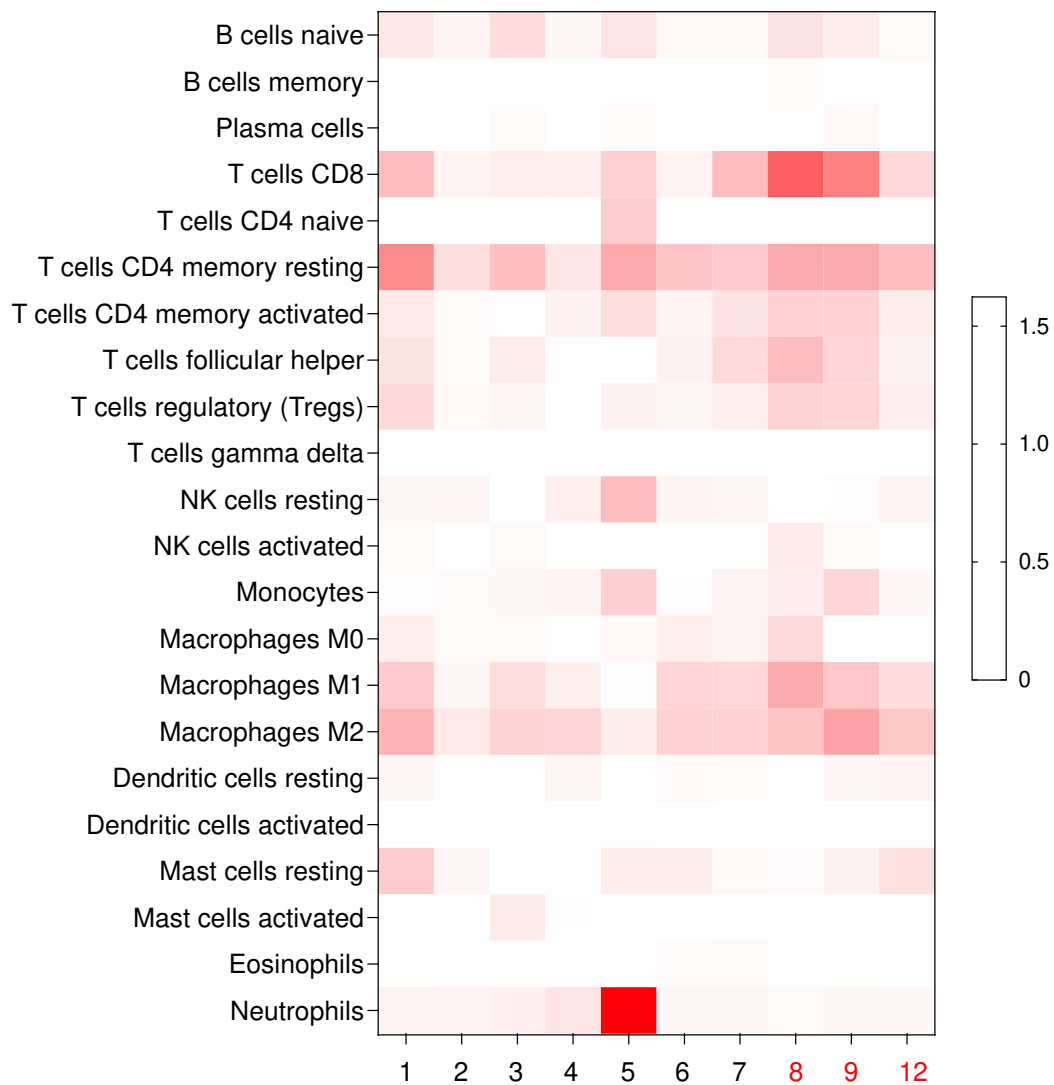

**Figure S1. CIBERSORT results of bulk RNA sequencing data from pre-treatment tumor tissue.**

Patient number is indicated on X-axis. Patients in red have median PFS of 2.3 years after lerapolturev and patients in black have median PFS 1.6 months after lerapolturev.

Supplementary Figure 2 (S2)

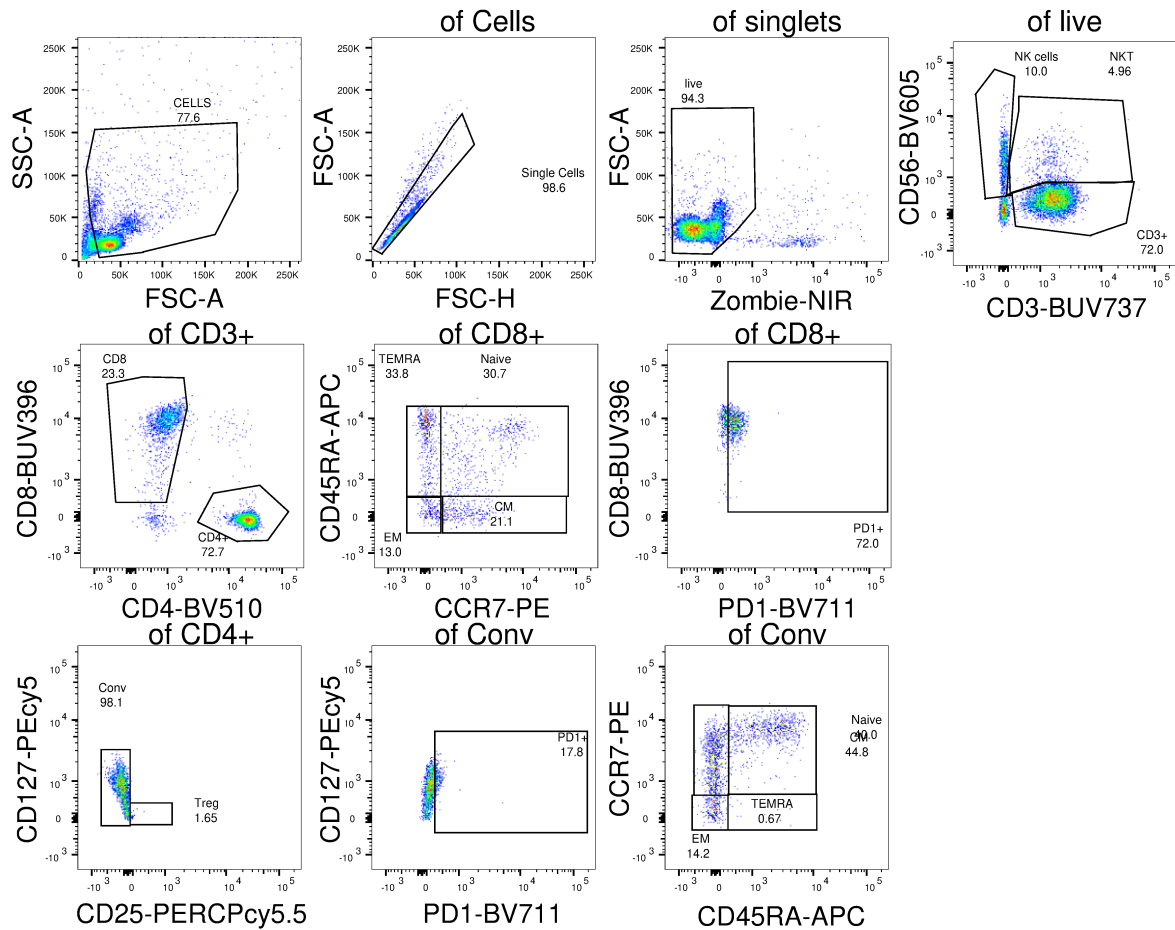

**Figure S2.** Flow cytometry gating strategy for detection of memory T cell populations and PD1 expression on CD8+ and CD4+ conventional T cells in Figure 5.

Supplementary Figure 3 (S3)

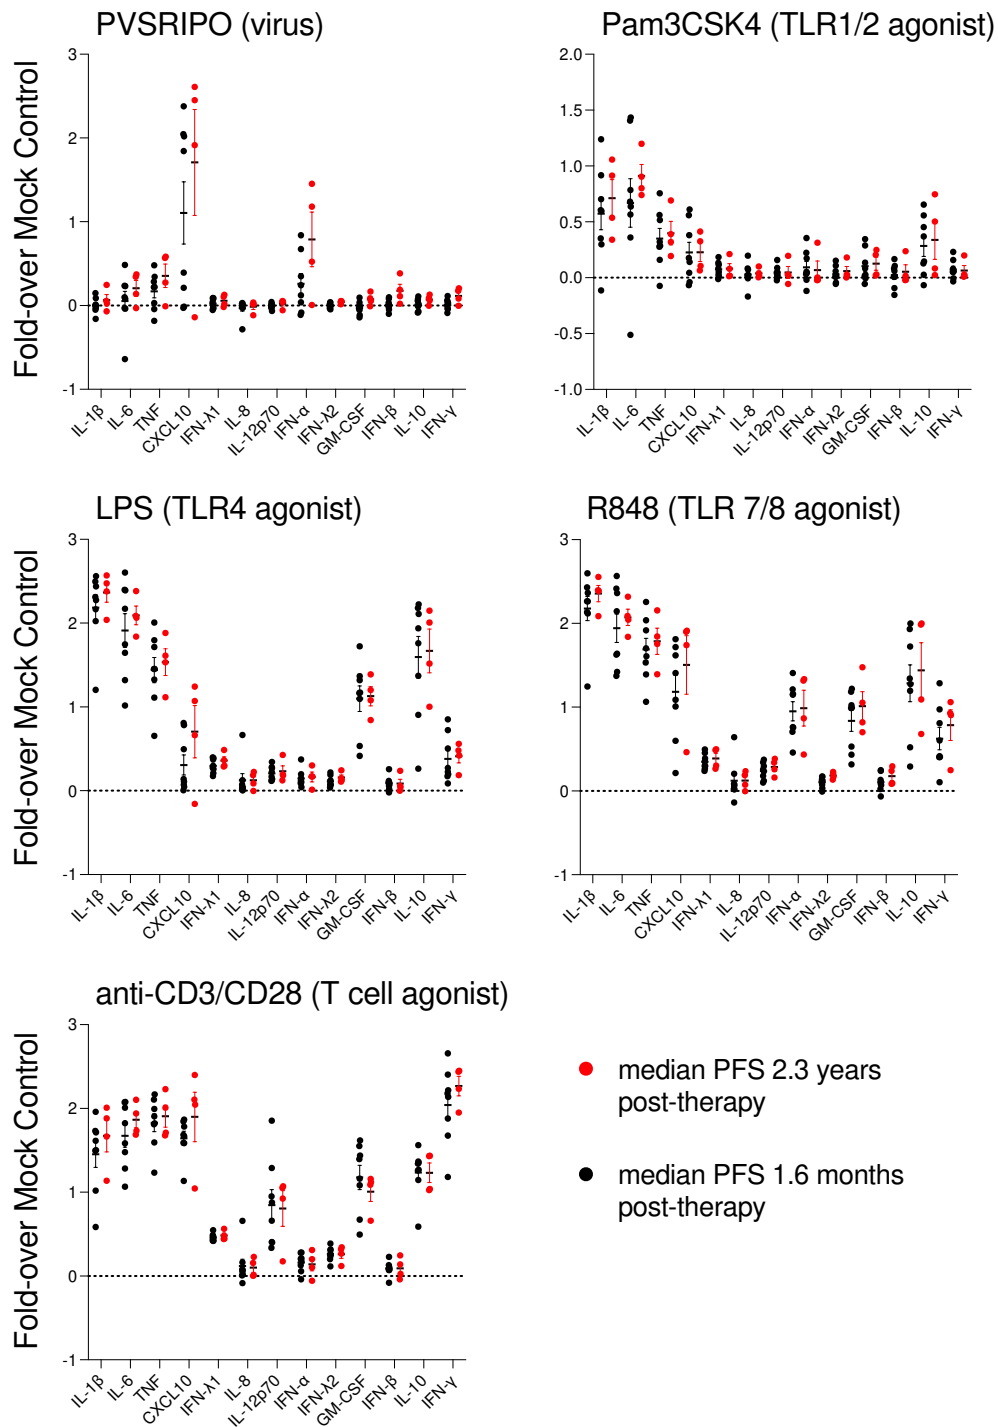**Figure S3. Assessment of baseline peripheral immune cell function in response to lerapolturev.**

PBMCs from the pre-treatment time point were challenged with laboratory grade PVSRIPO in vitro for 24 hours. Supernatant was tested for pro-inflammatory cytokines. Patients in red have median PFS of 2.3 years after lerapolturev and patients in black have median PFS 1.6 months after lerapolturev.

Supplementary Figure 4A (S4A)

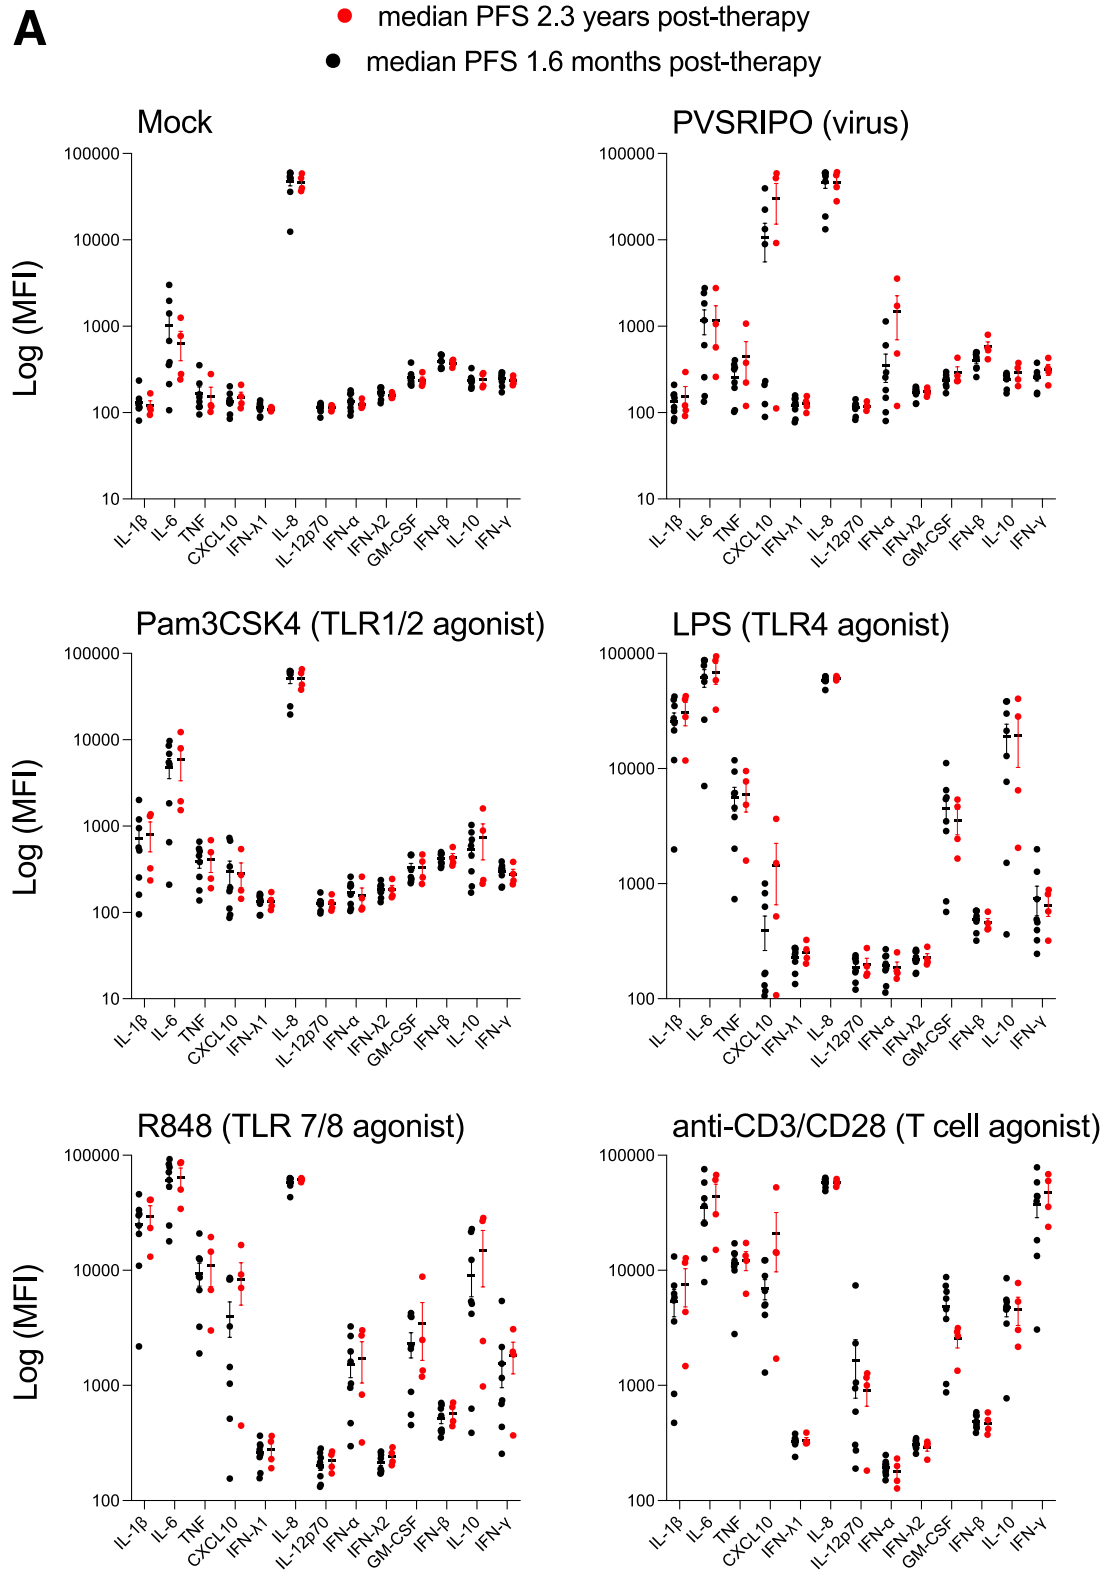

Supplementary Figure 4B (S4B)

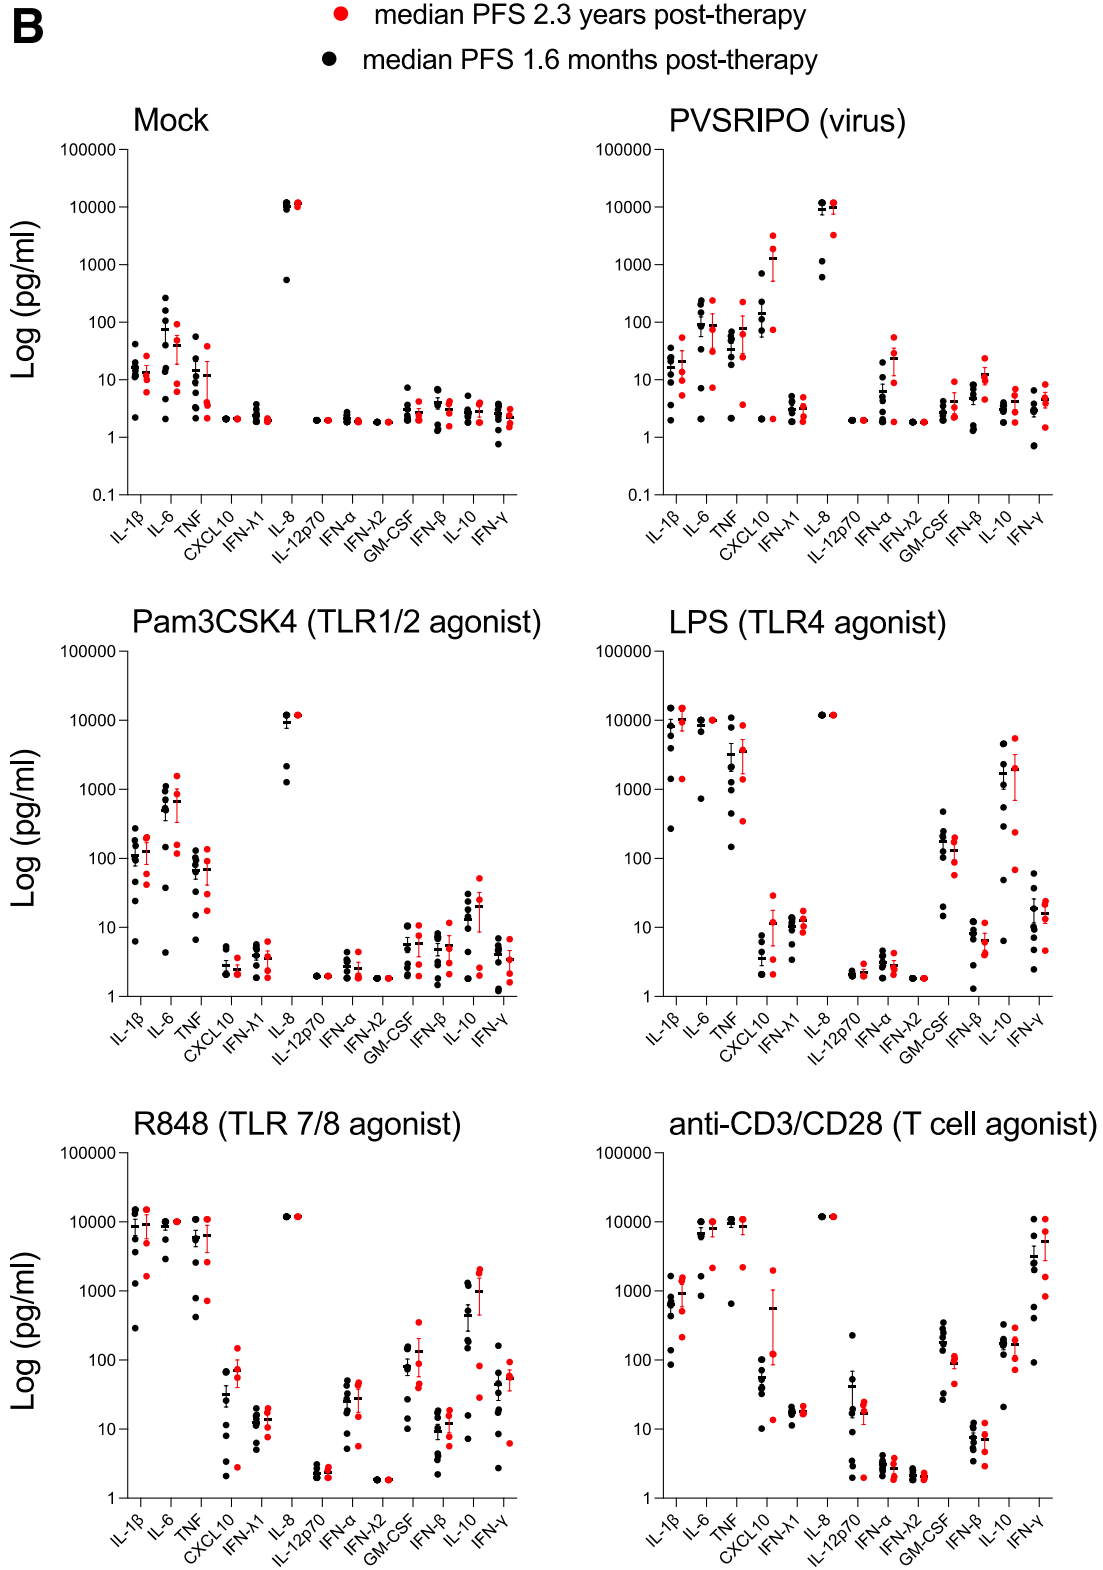

**Figure S4. Peripheral immune cell function at baseline.**

Raw MFI (A) or concentration (pg/ml, B) of analytes after each treatment corresponding to data presented in Figure 6. (B) For values below or above the maximum standard concentration threshold, values were set to the minimum or maximum threshold, respectively. Patients in red have median PFS of 2.3 years after lerapolturev and patients in black have median PFS 1.6 months after lerapolturev.
